# Supplementary figures and images for: HNF-4α inhibits hepatocellular carcinoma cell proliferation through mir-122-adam17 pathway
Source: PubMed Central journal article supplement (PMC7094838; doi:10.1371/journal.pone.0230450), 2020-03-25

Fig. 2

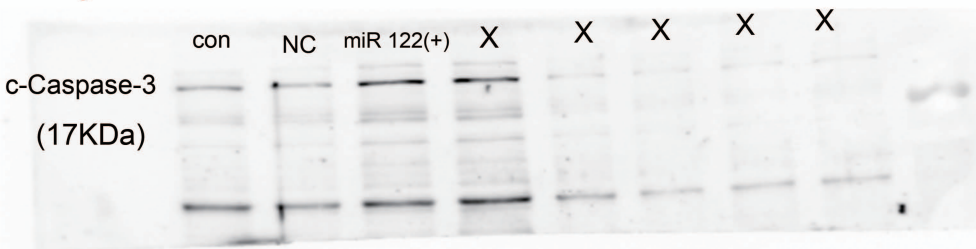

Fig.2

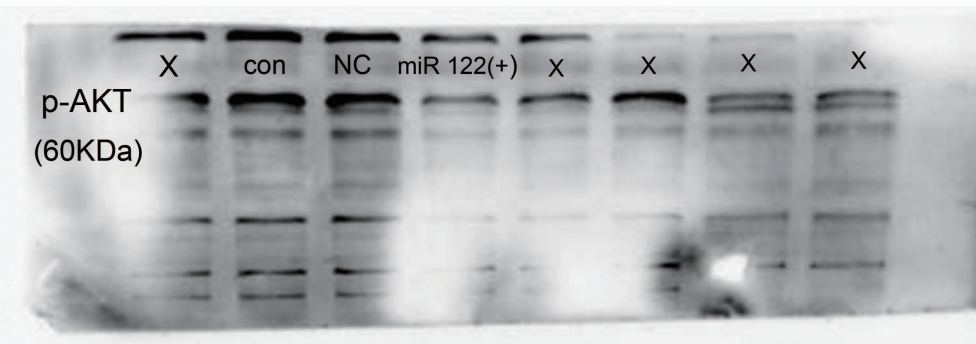

Fig.4

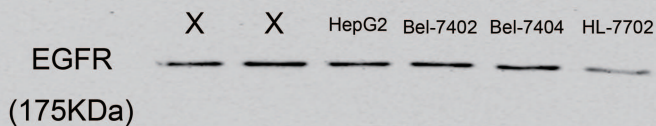

Supplement: pone.0230450.s001.pdf [file pone.0230450.s001.pdf]
